# Supplementary material for: Dinickel complexes with anthyridine-based ligands
Source: Royal Society of Chemistry journal article supplement (doi:10.1039/c6dt00567e), 2016-01-01
Supplement: c6dt00567e1.pdf [file c6dt00567e1.pdf]

# Dinickel Complexes With Anthyridine-based Ligands

*Da-wei Huang, Yi-Hung Liu, Shie-Ming Peng, and Shih-Tzung Liu\**

Department of Chemistry, National Taiwan University, Taipei 106, Taiwan

Supplementary Materials (4 pages)

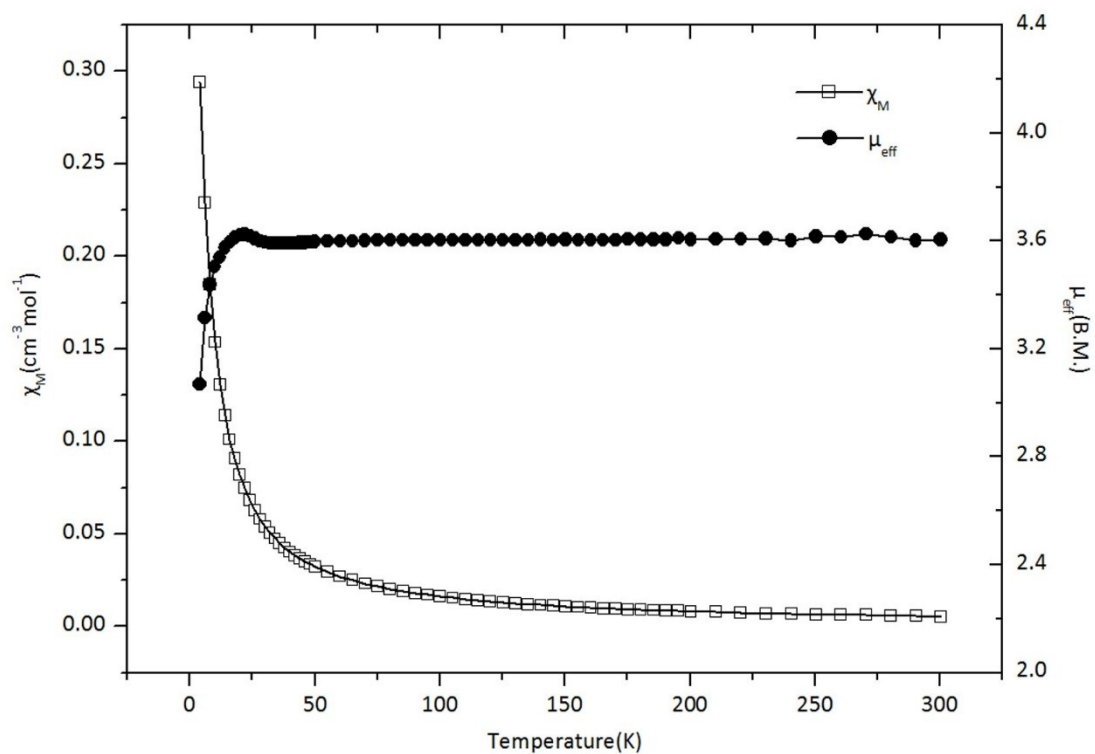

**Figure S1.** Plots of  $\chi_M$  ( $\square$ ) and  $\mu_{\text{eff}}$  ( $\bullet$ ) vs. T for **2**. The solid line corresponds to the theoretical fit.

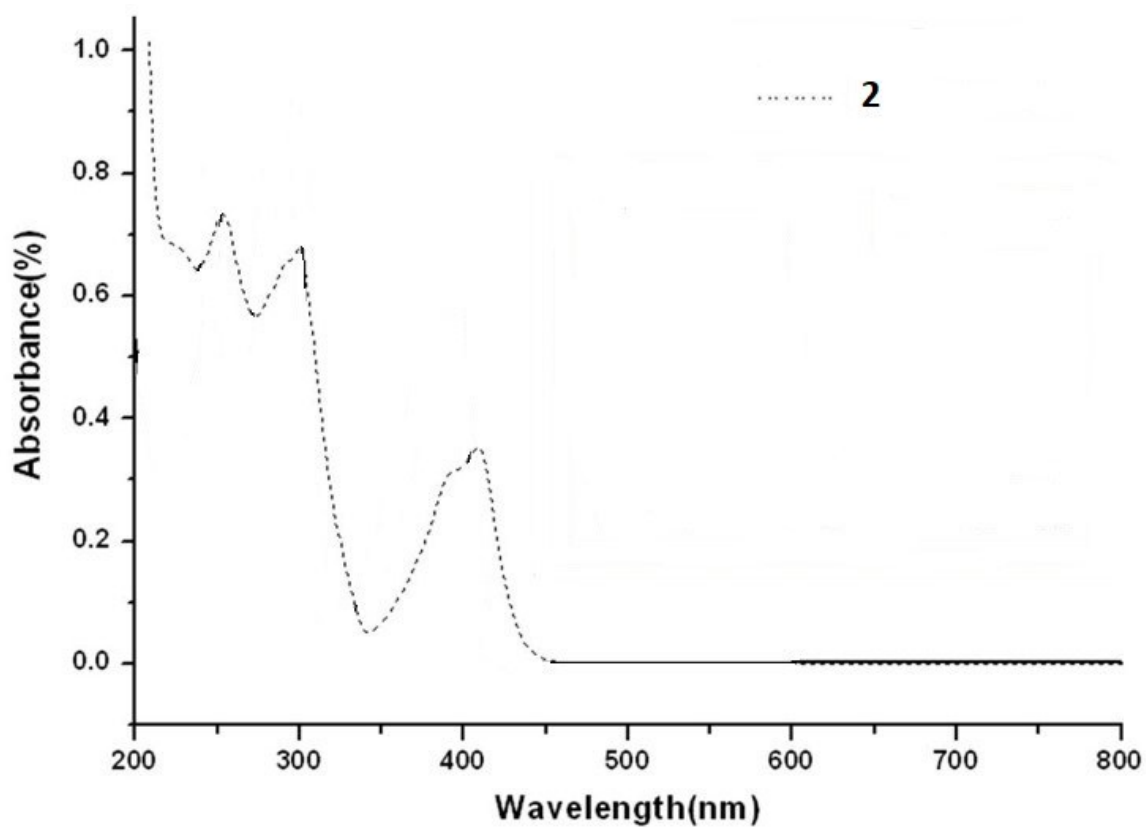

**Figure S2.** UV-Vis absorption of complex 2.

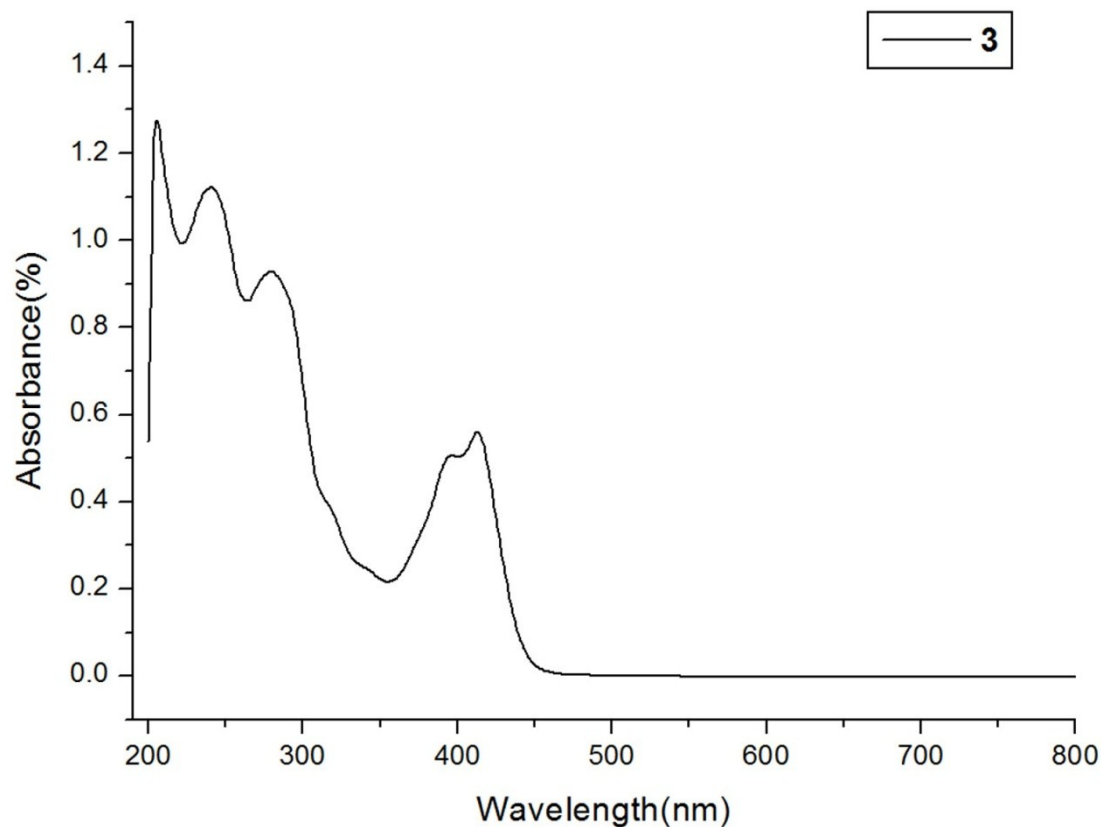

**Figure S3.** UV-Vis absorption of complex 3.

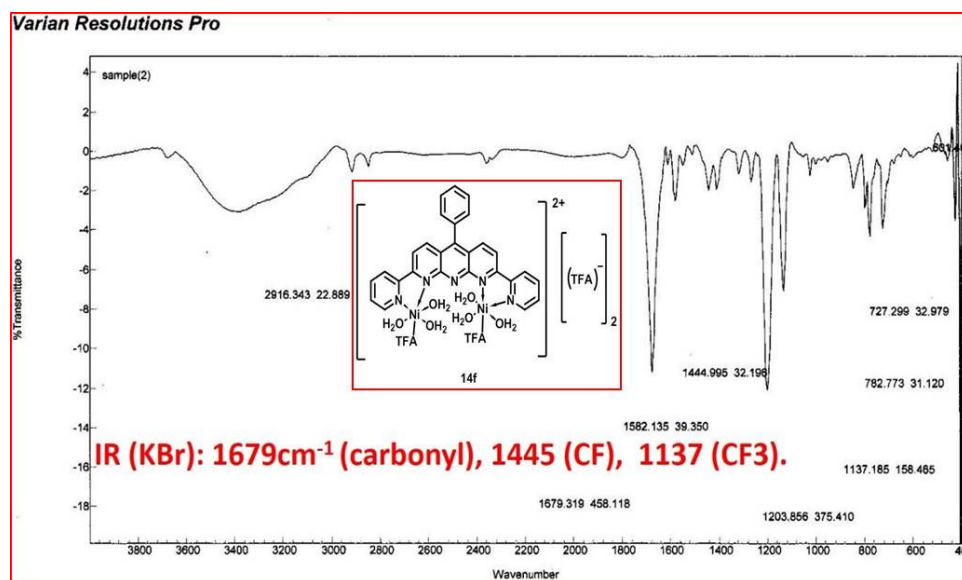

**Figure S4.** IR spectrum of complex 2.

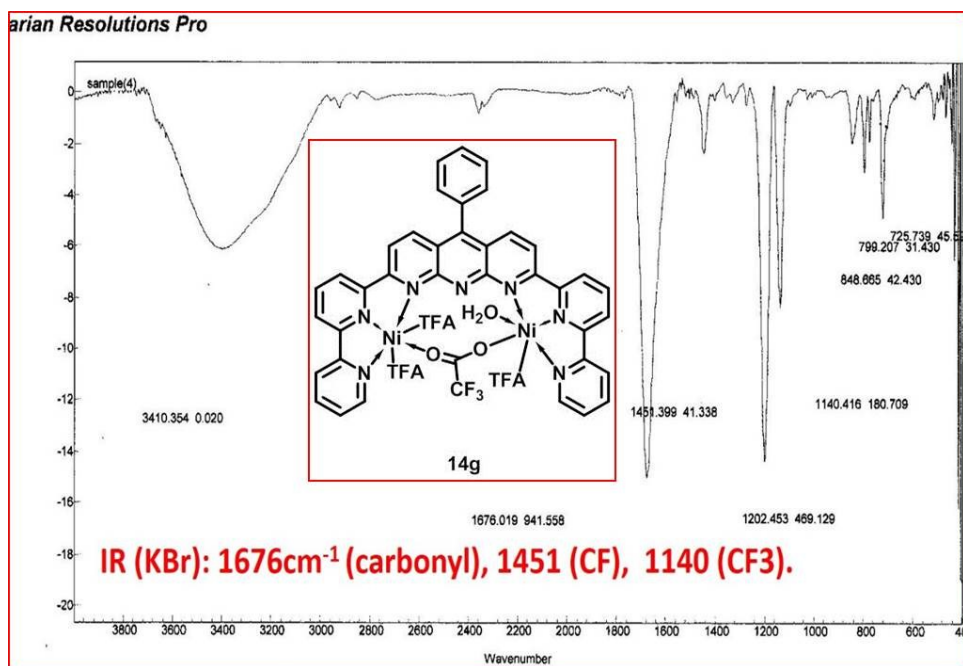

Figure S5. IR spectrum of complex 3.

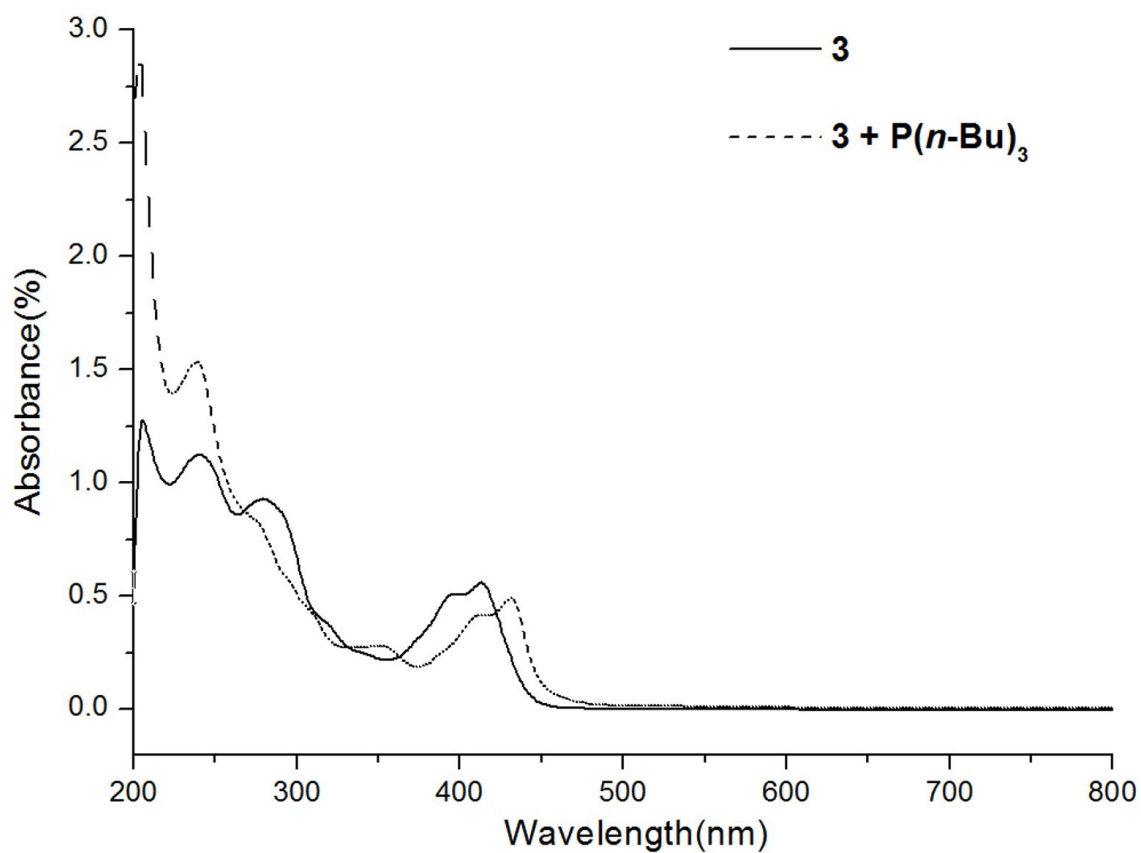

Figure S6. I UV-Vis absorption of complex 3 with Bu<sub>3</sub>P.
